# Supplementary material
Source: PubMed Central journal article supplement (PMC6294694)

Figure S1

a

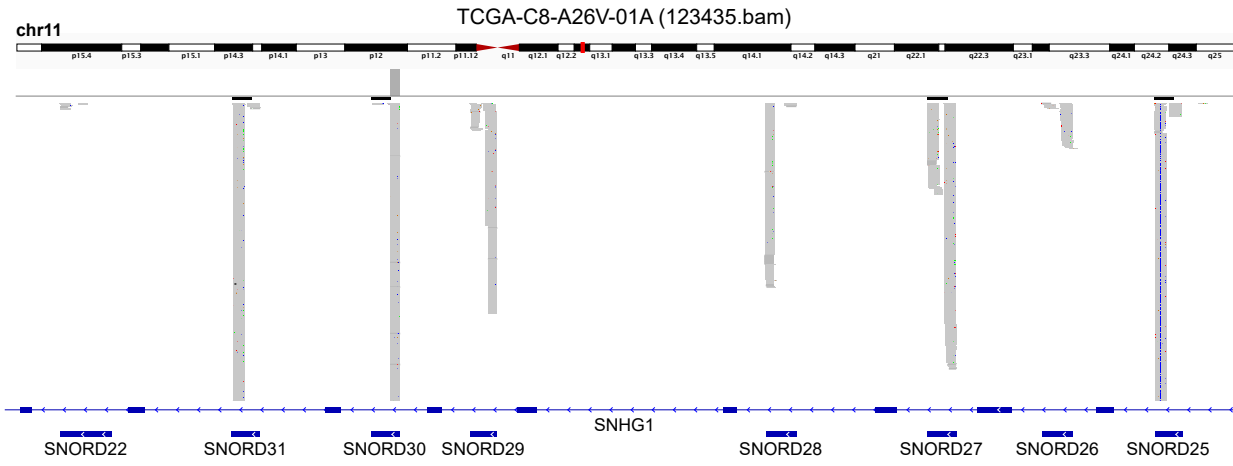

b

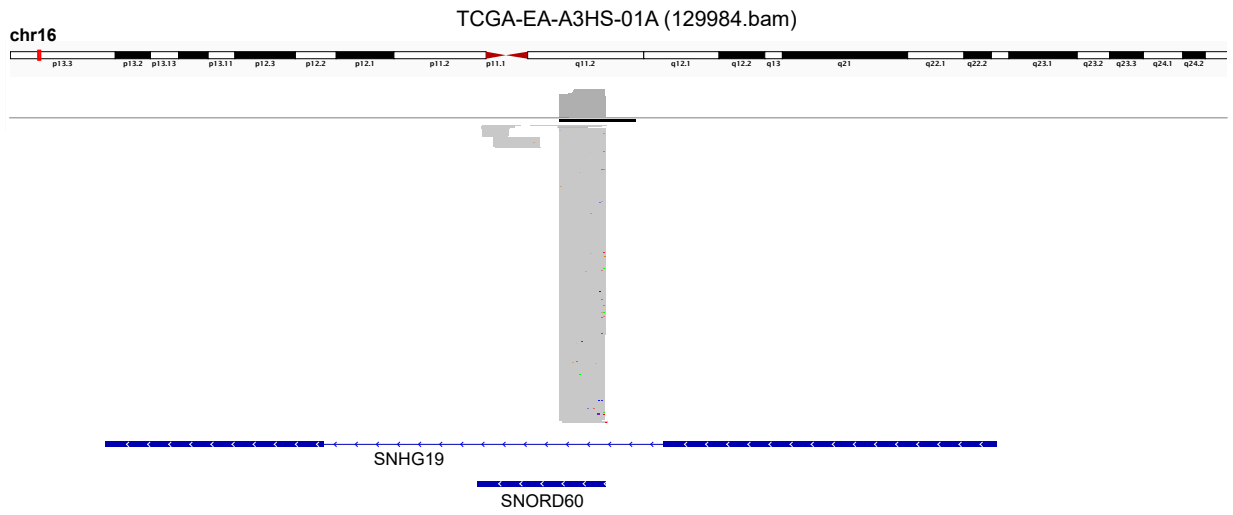

c

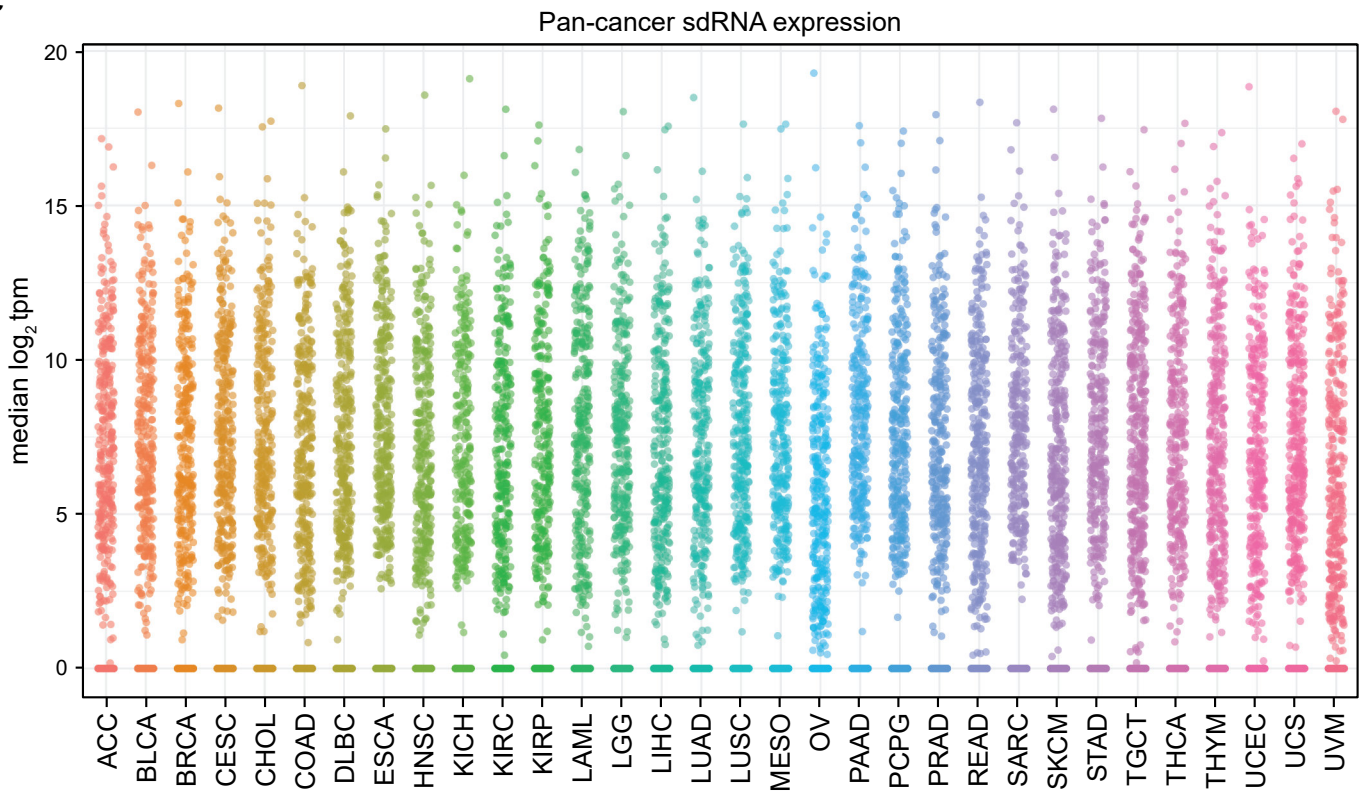

**Figure S2**

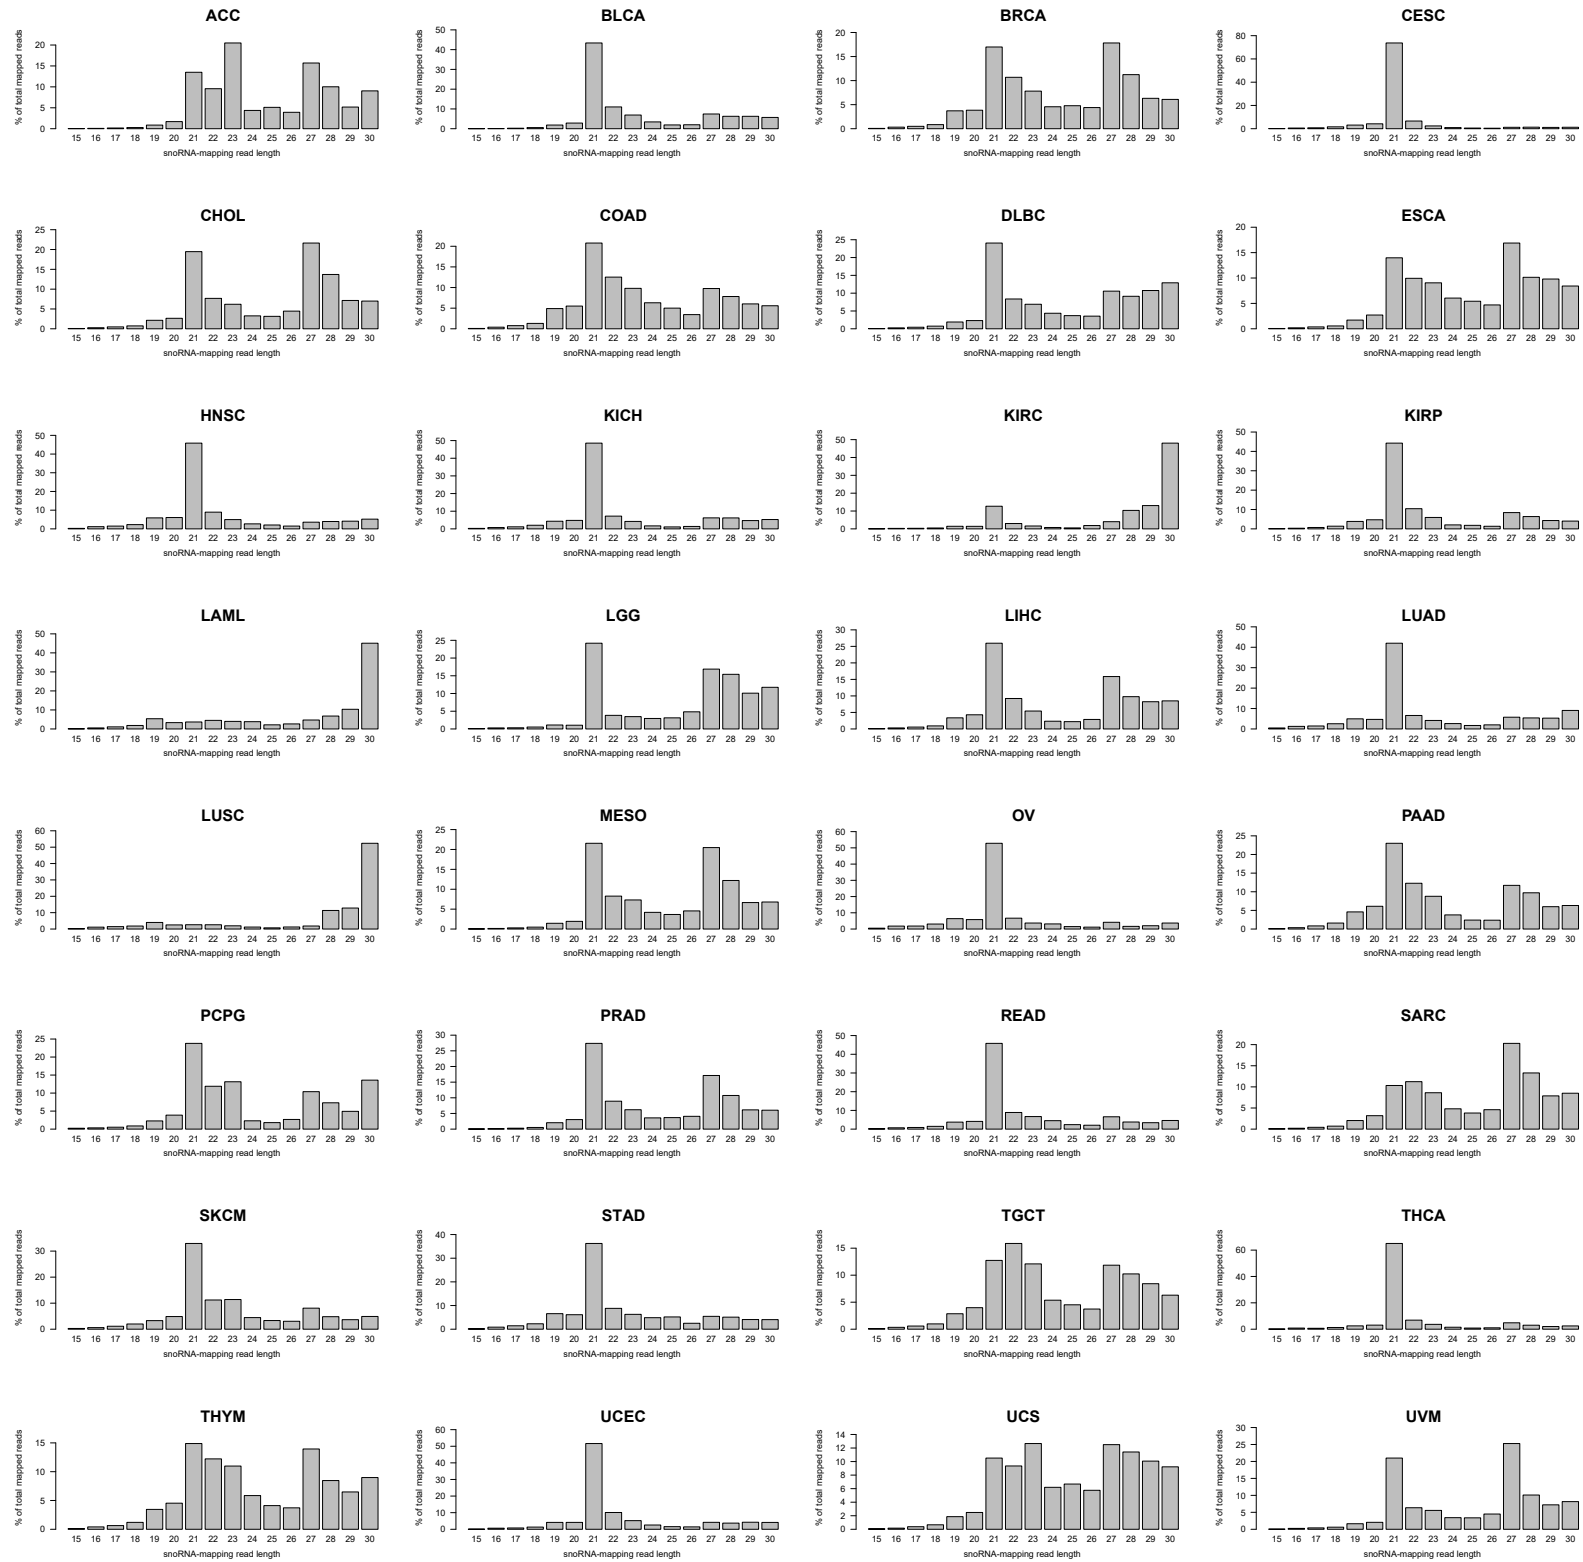

Figure S3

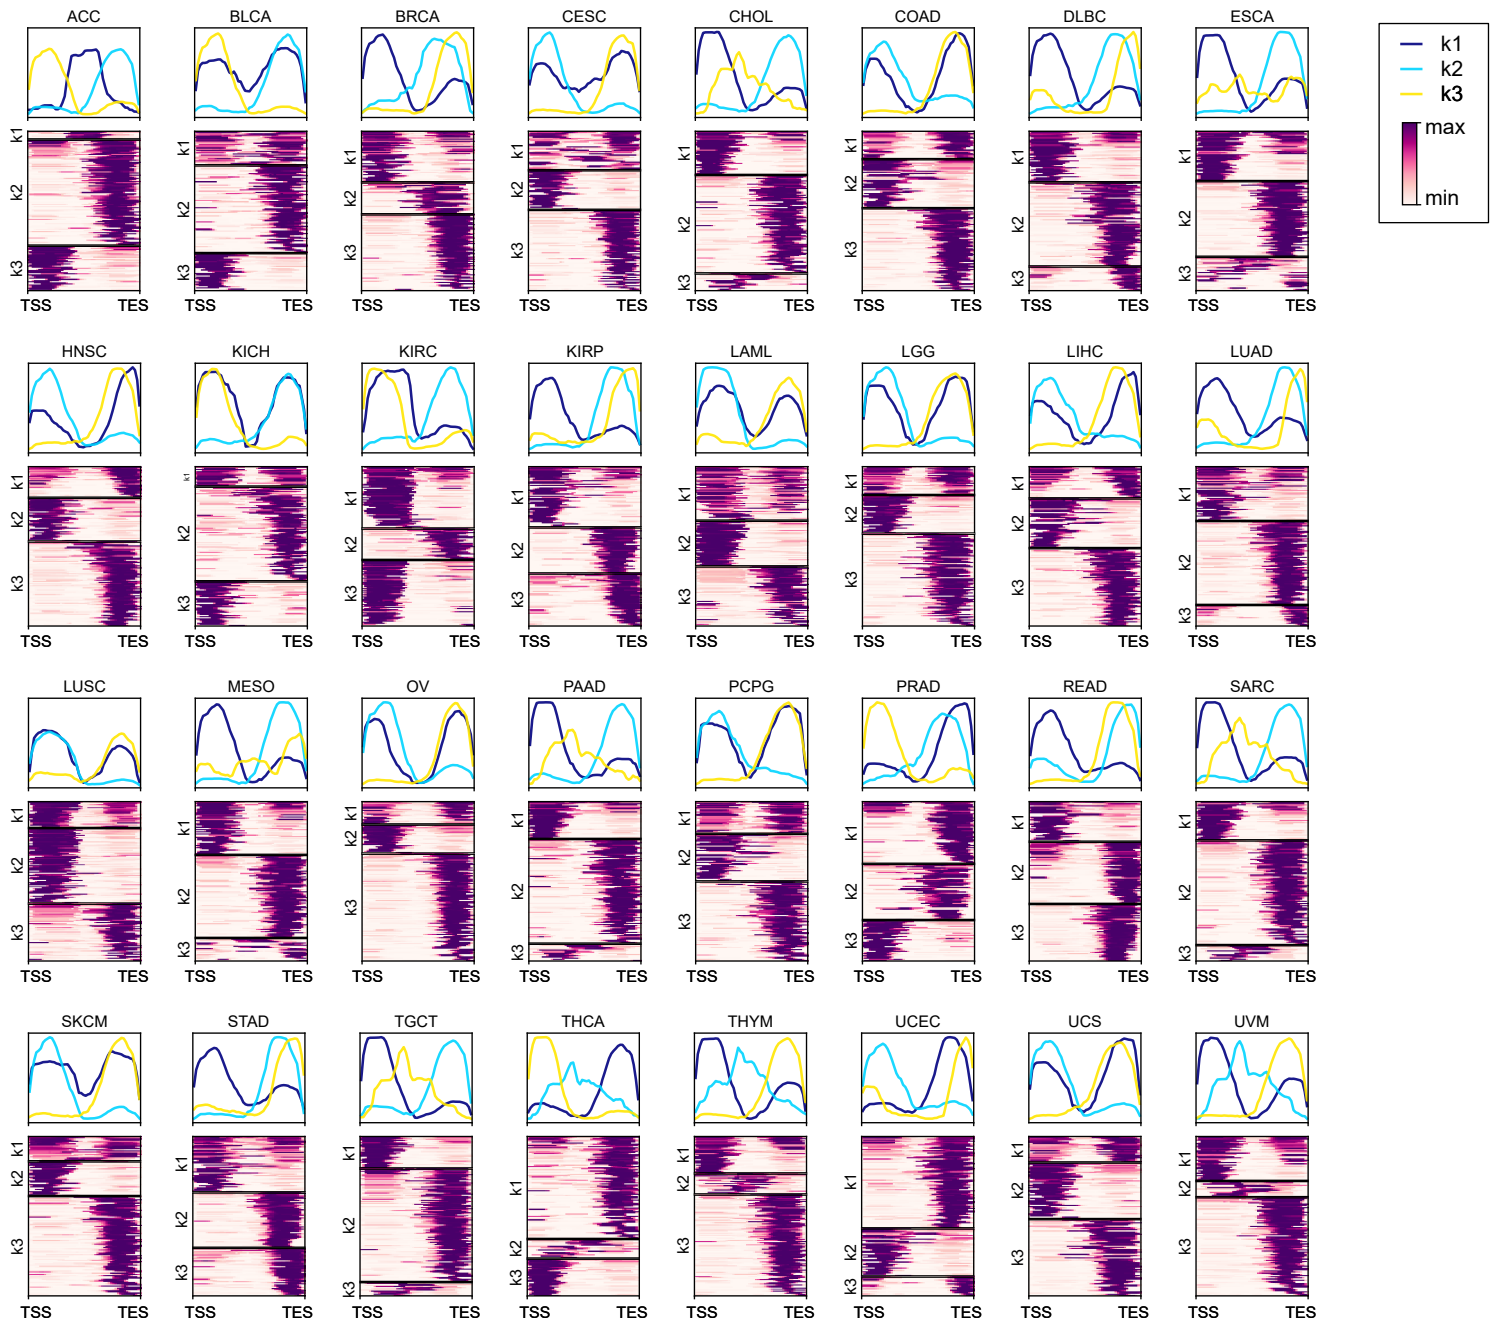

Figure S4

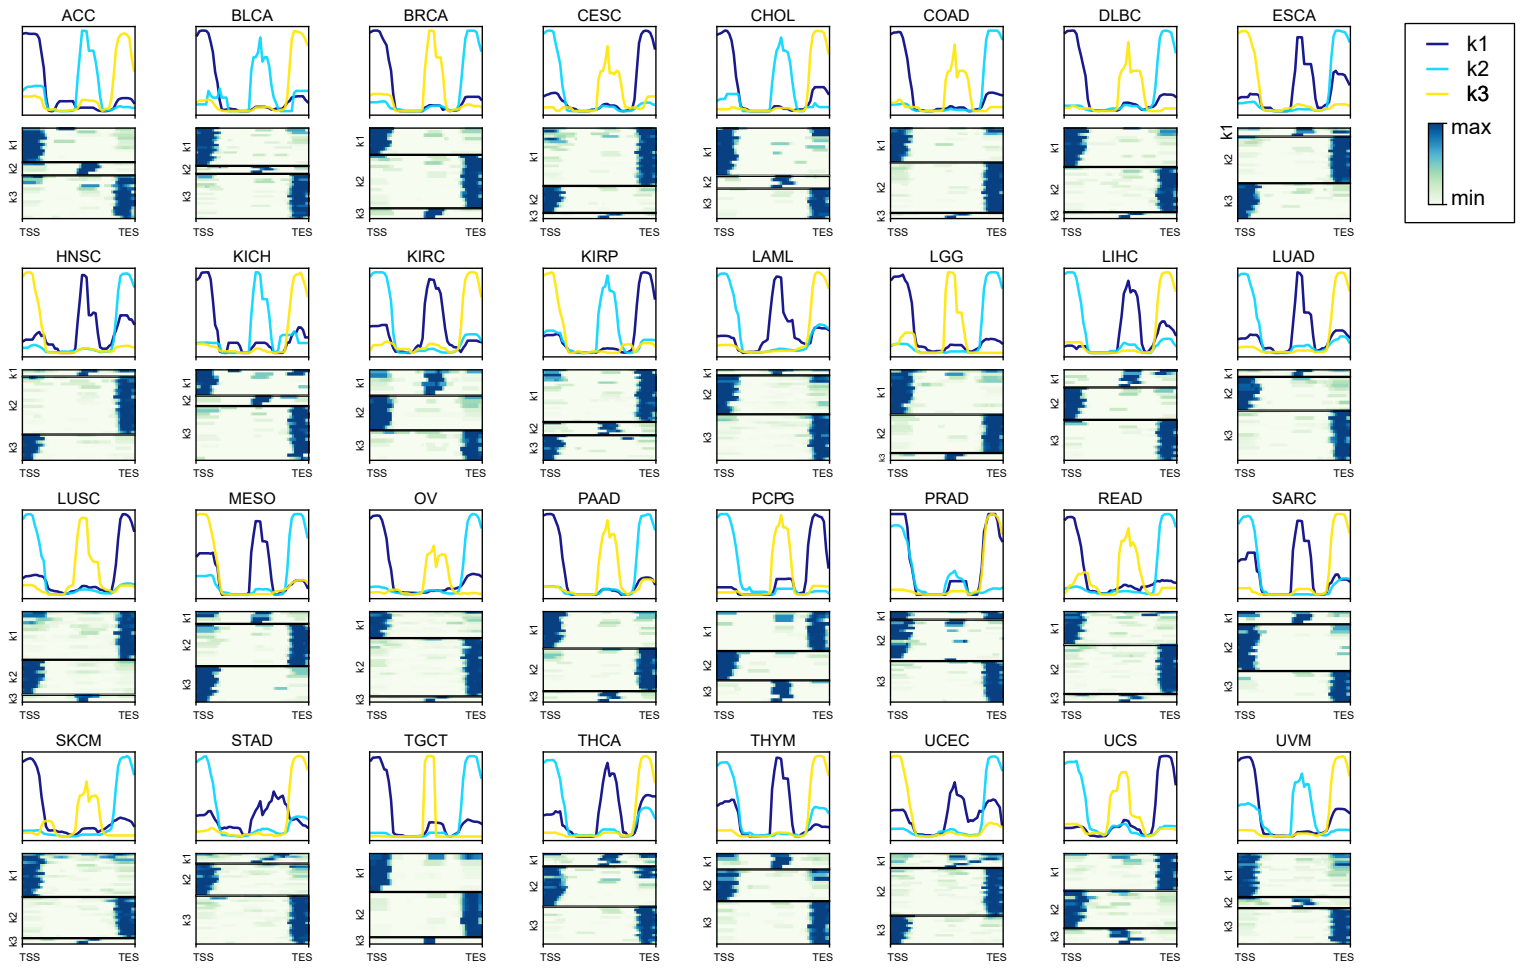

Figure S5

a

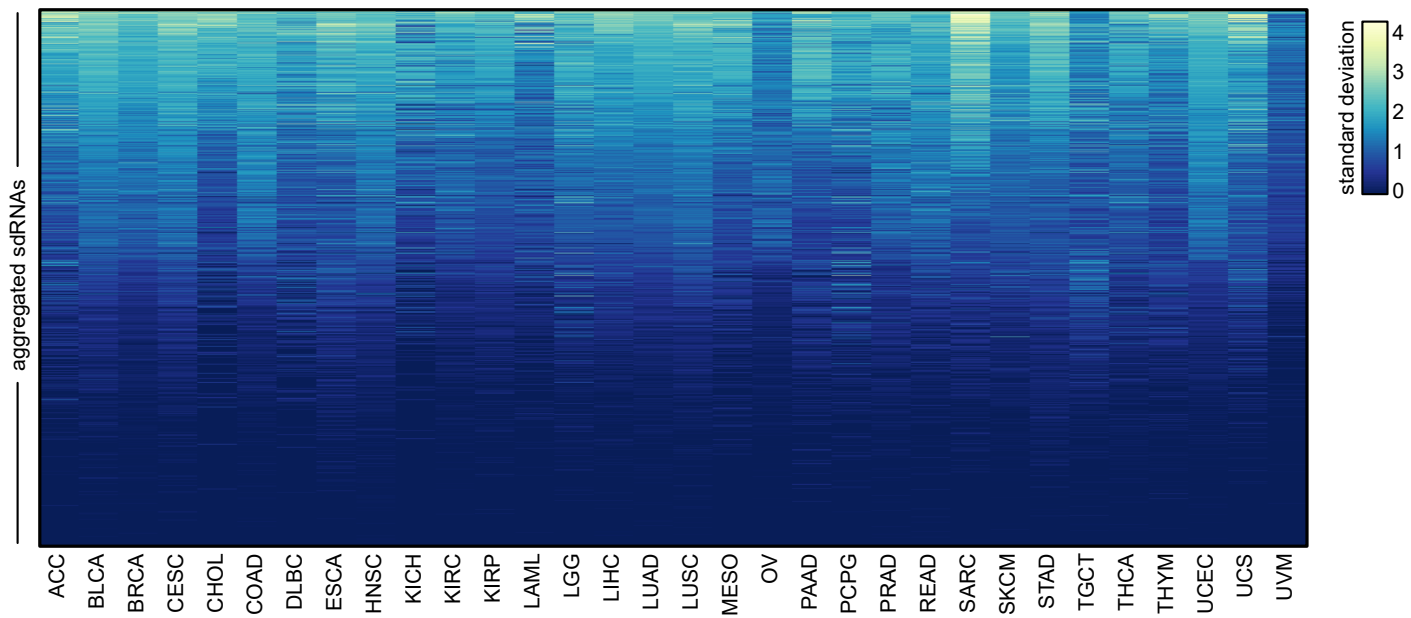

b

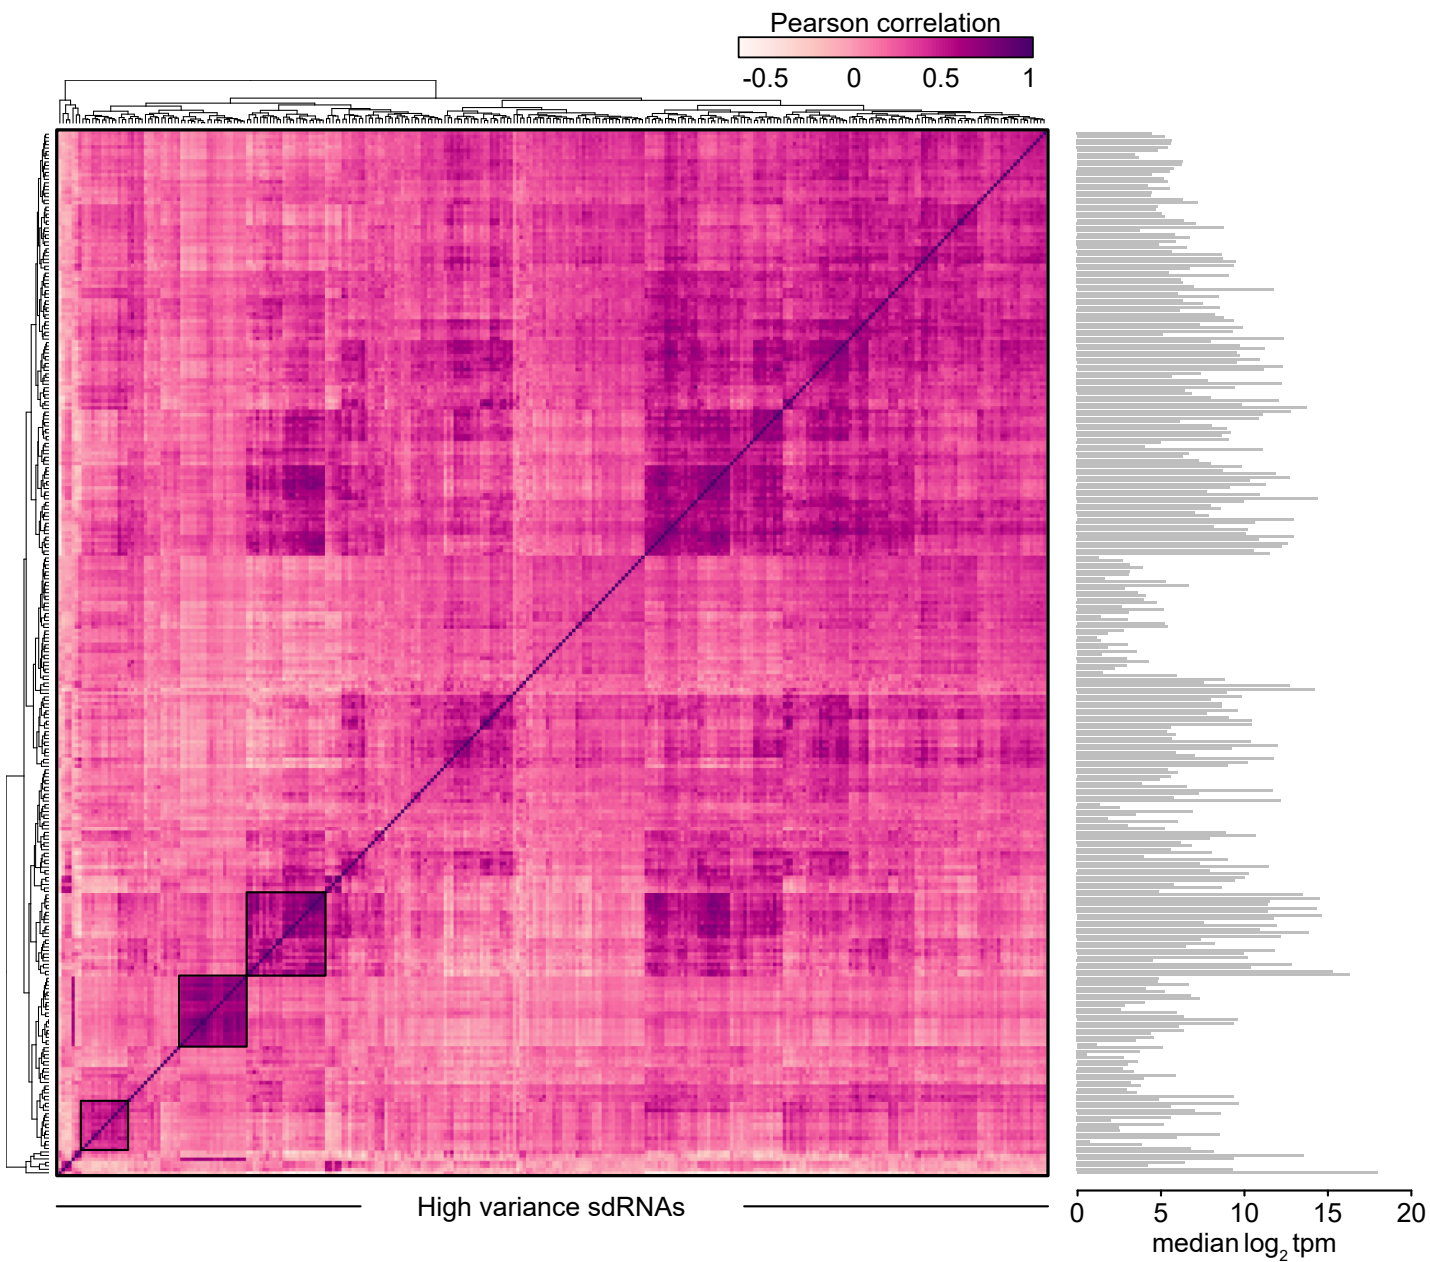

Figure S6

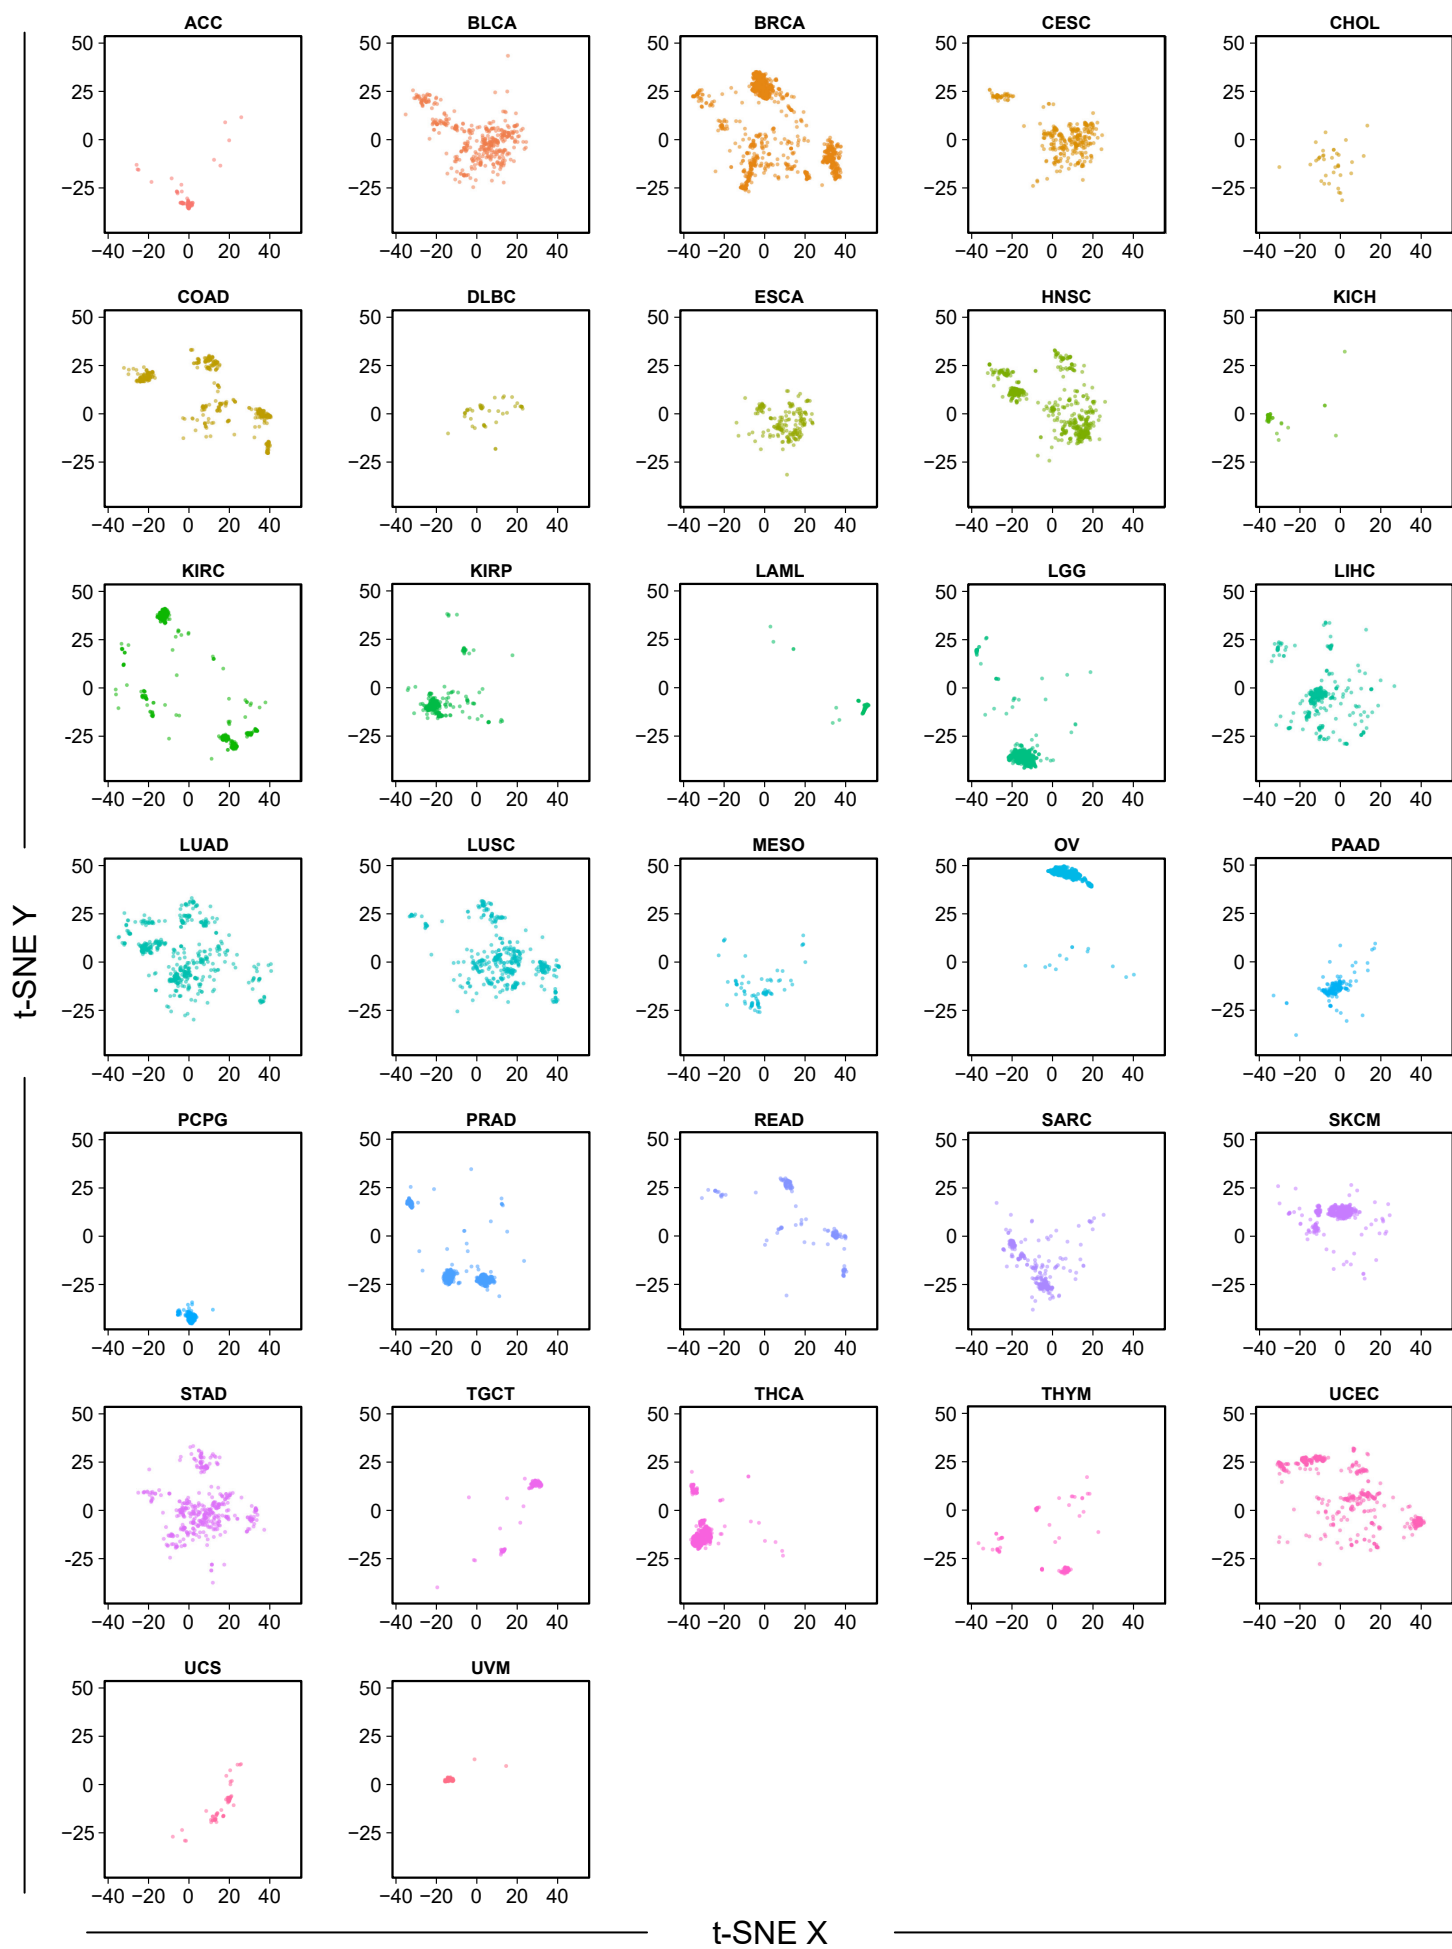

**Figure S7**

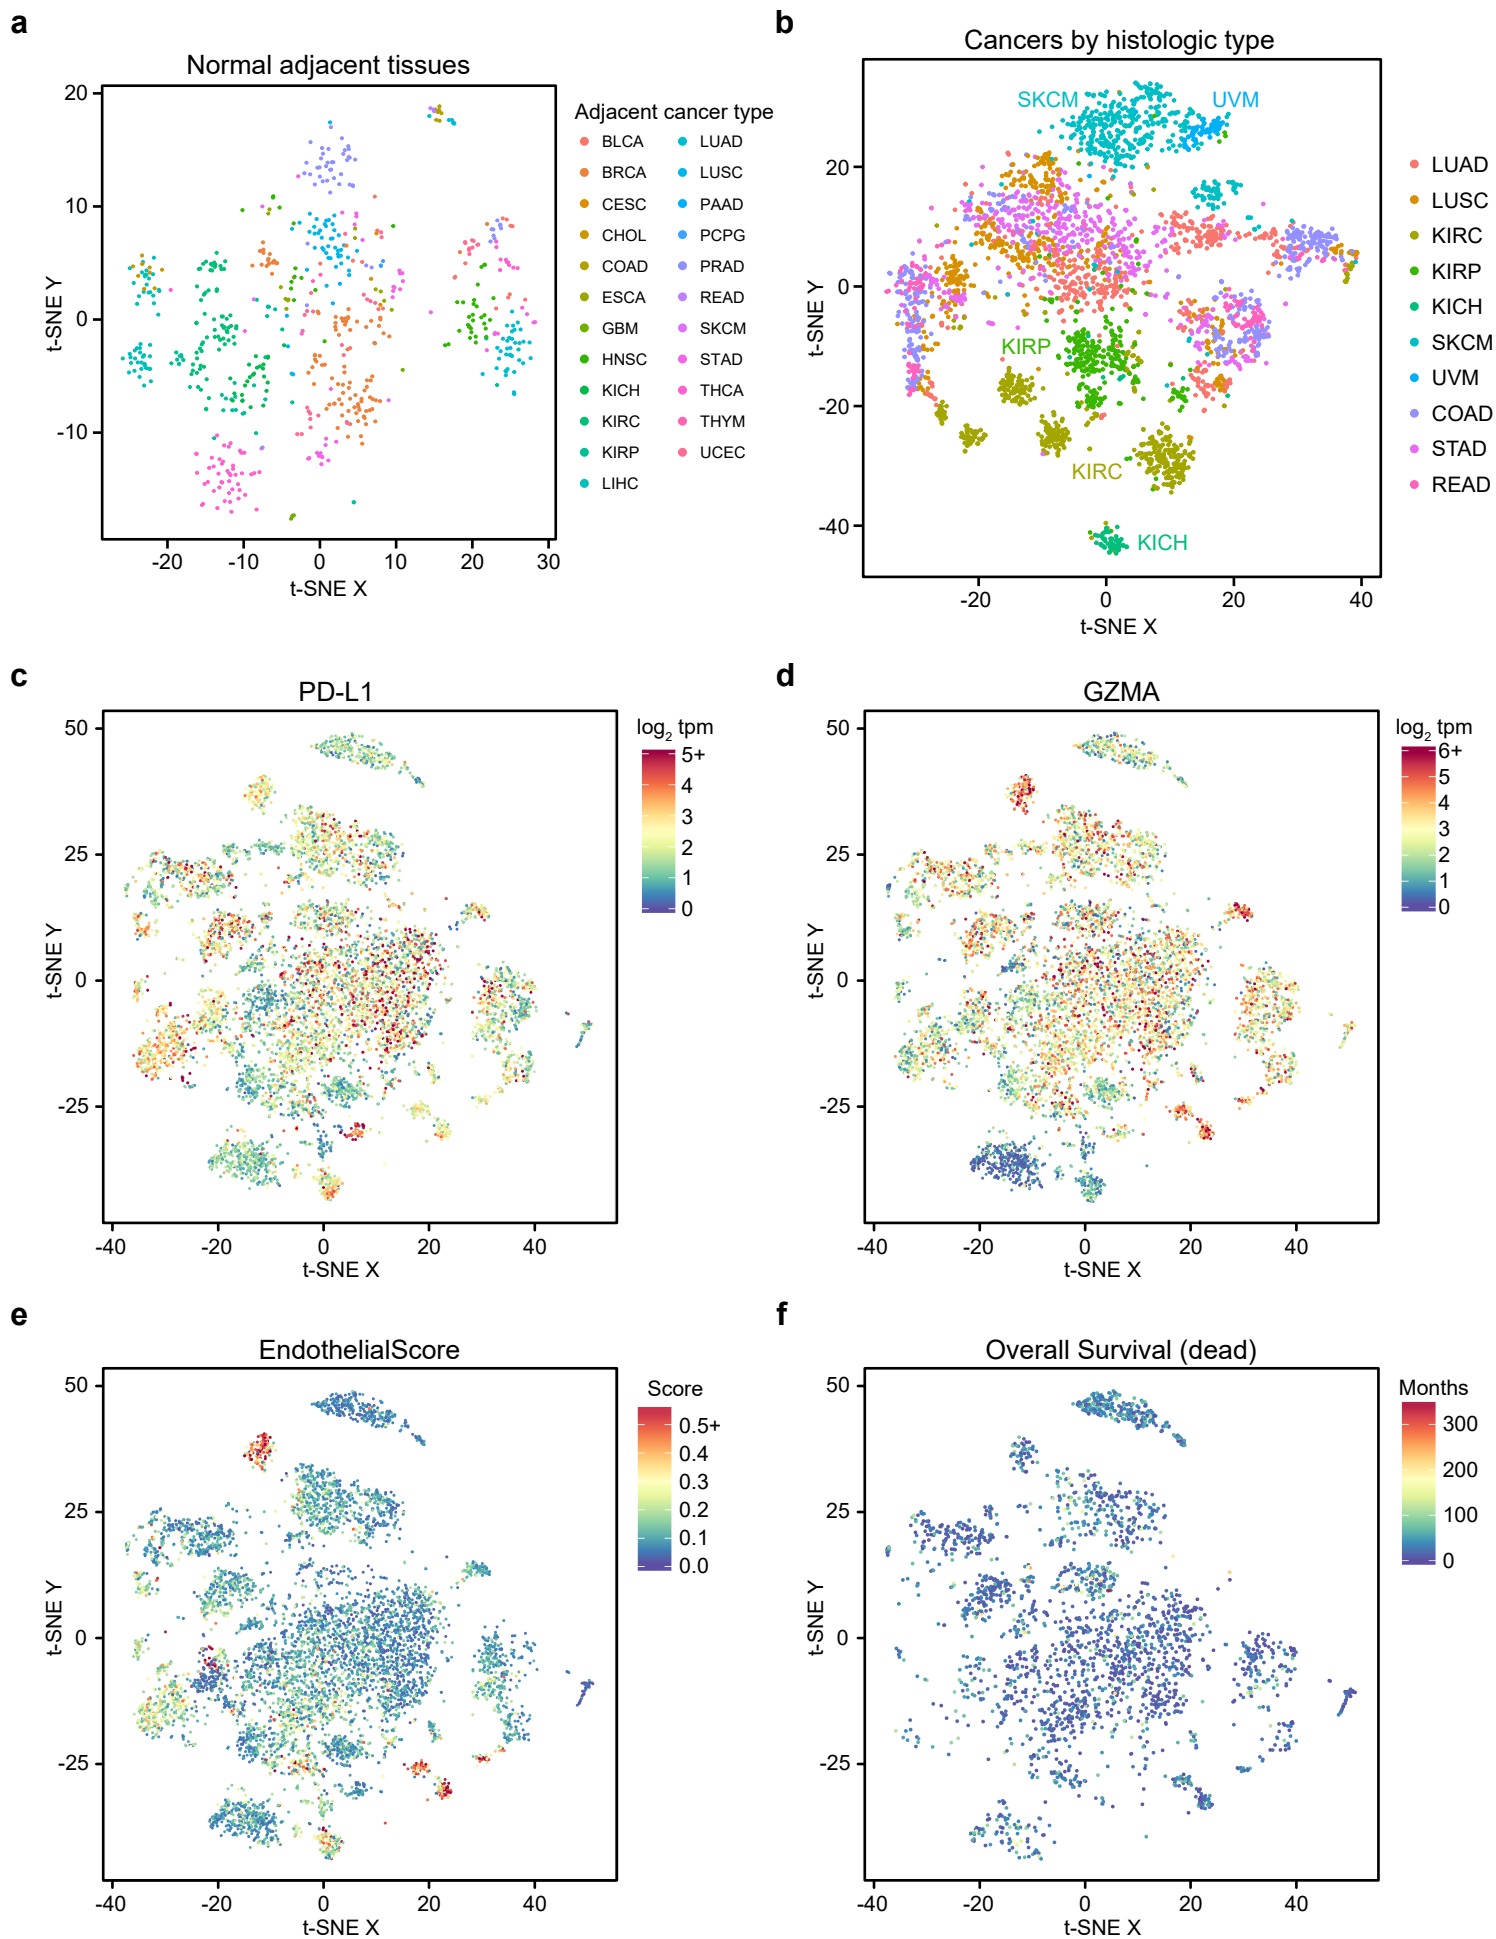

**Figure S8**

**a**

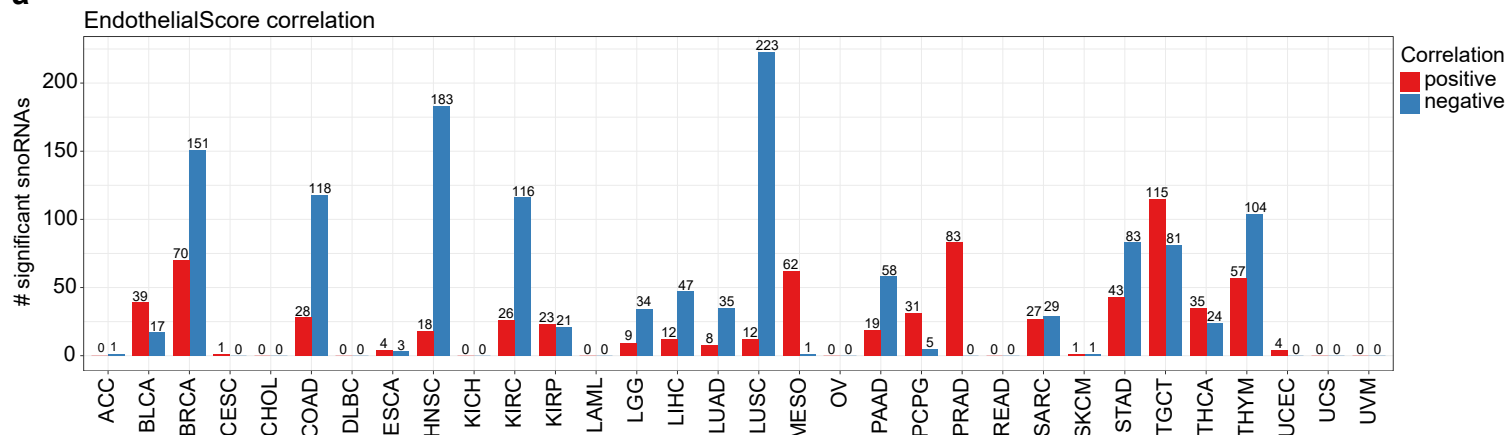

**b**

Significant positive correlation with EndothelialScore in  $\geq 4$  cancer types

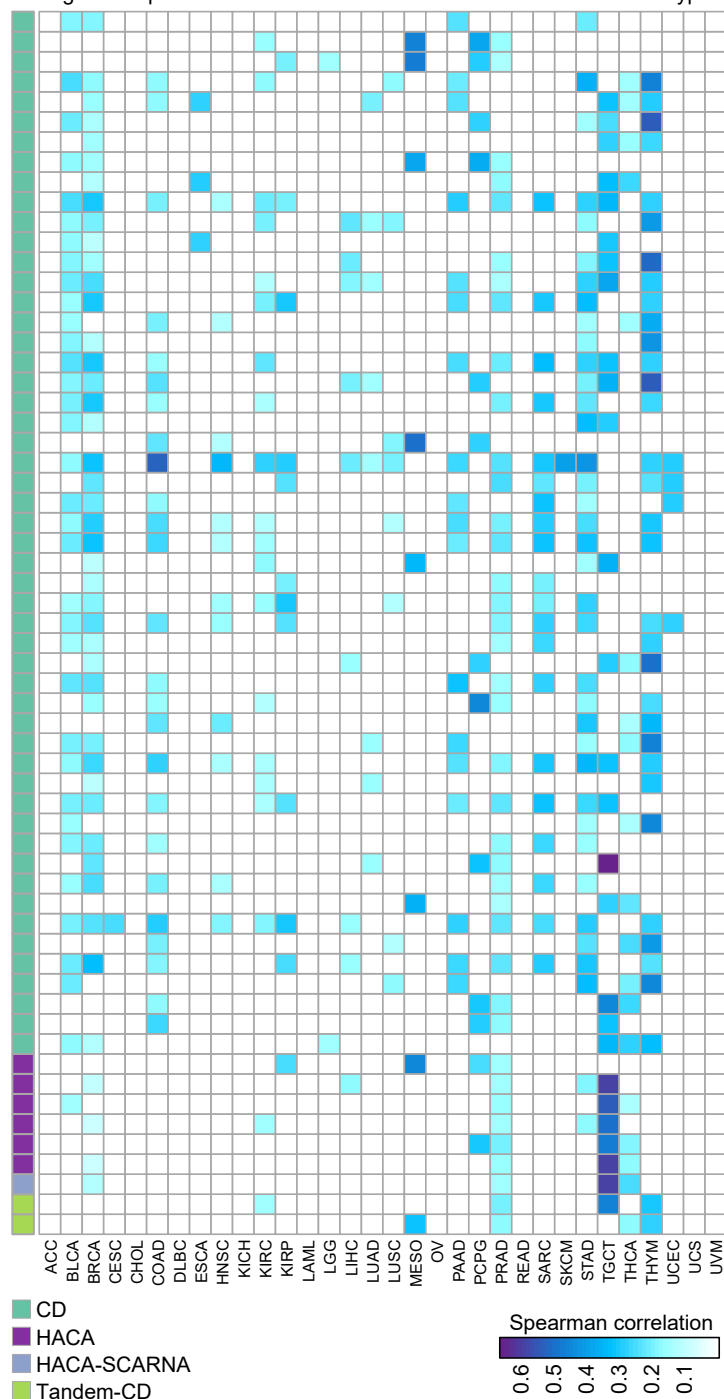

**c**

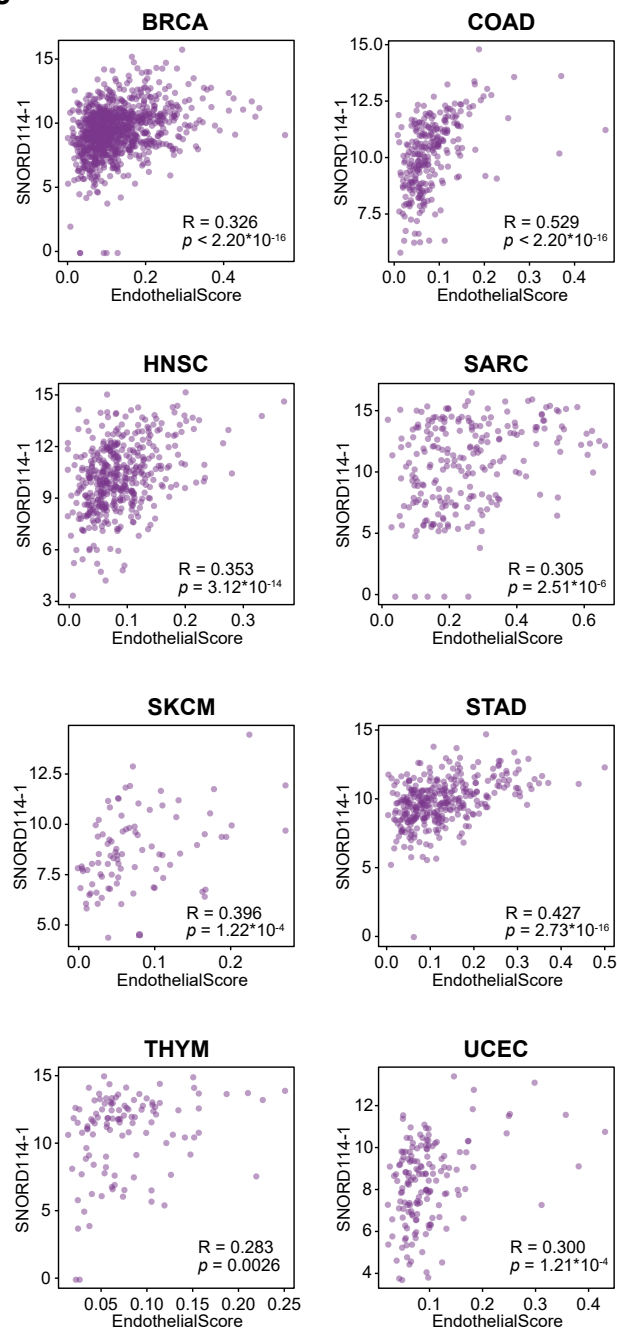



Figure S9

a

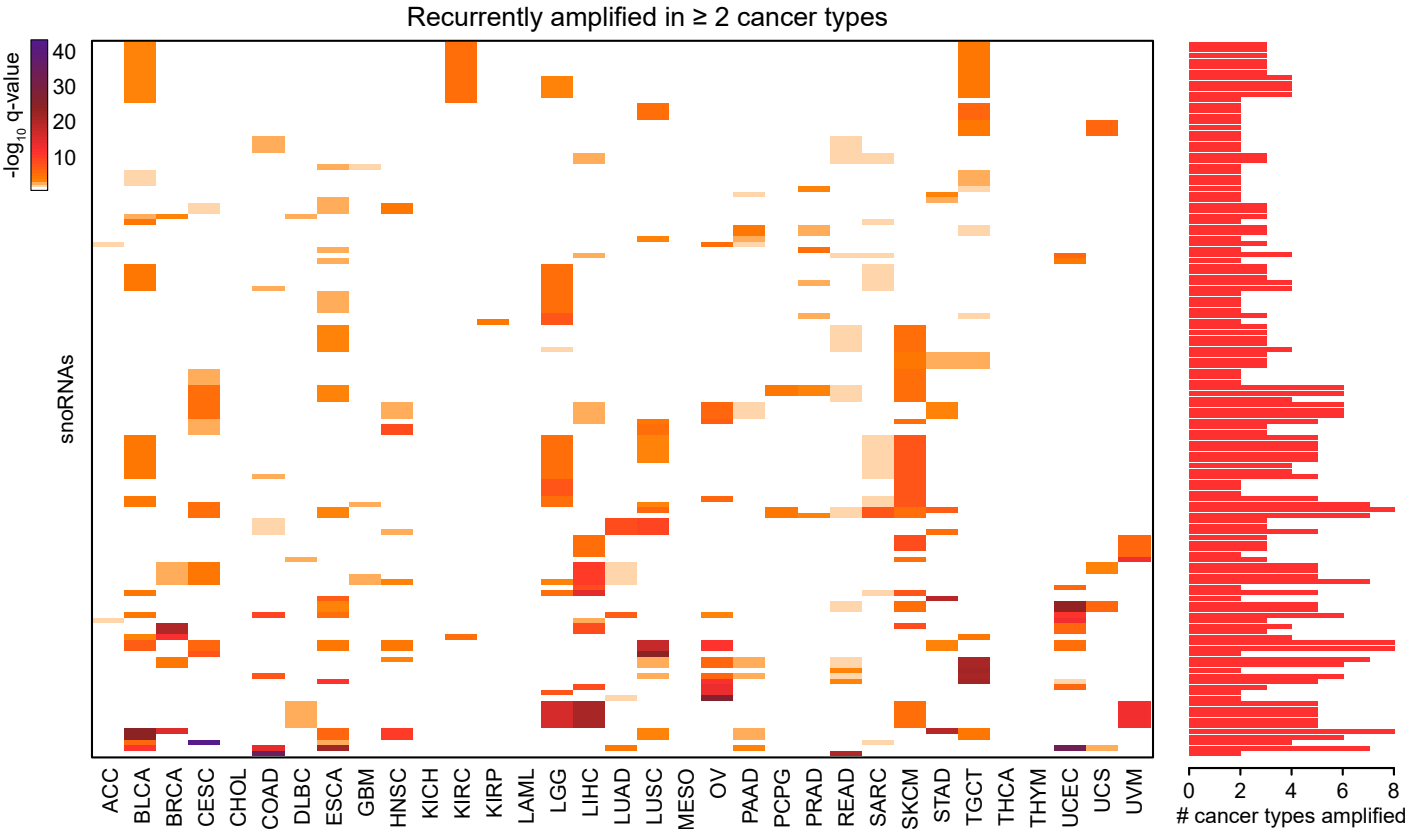

b

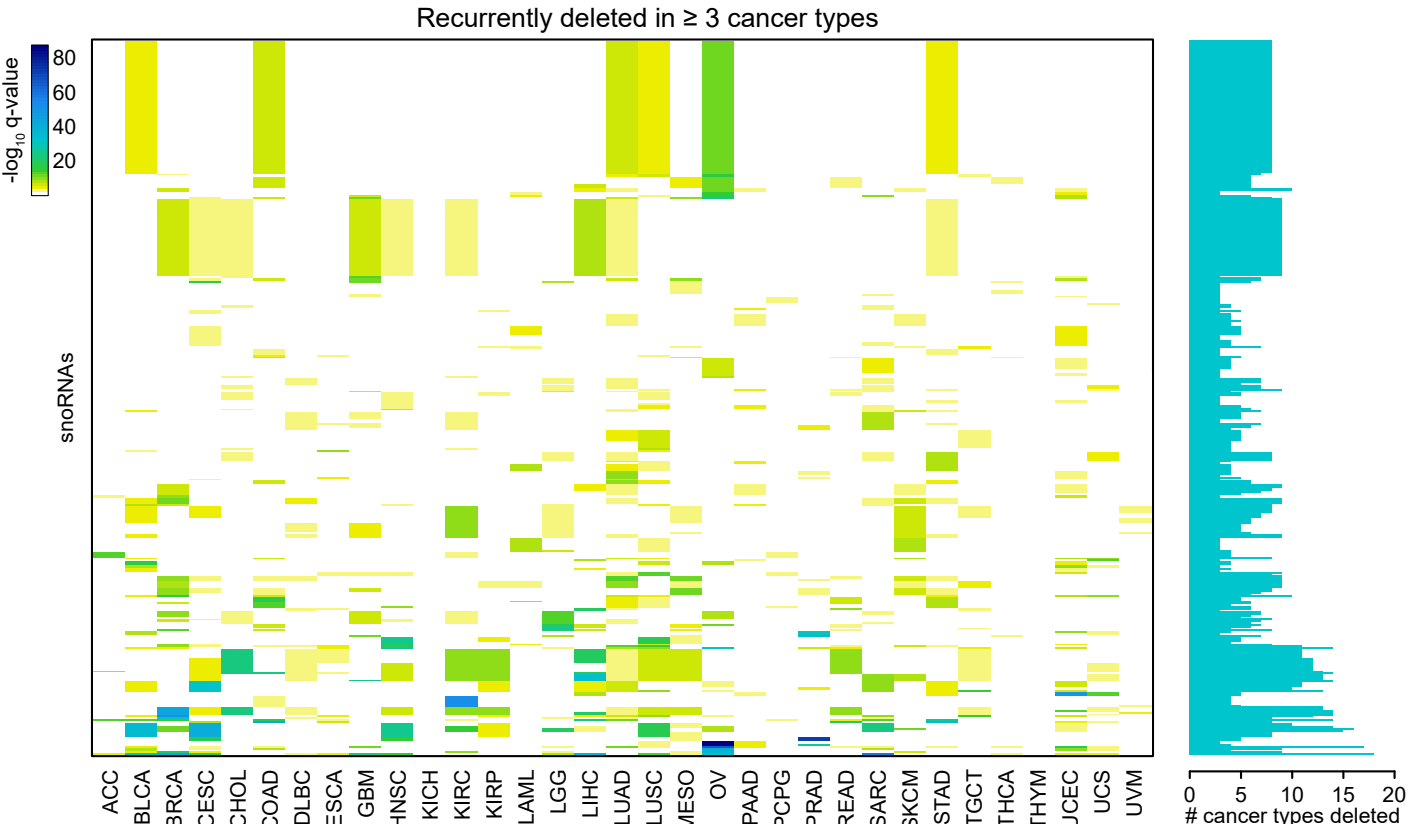

Figure S10

a

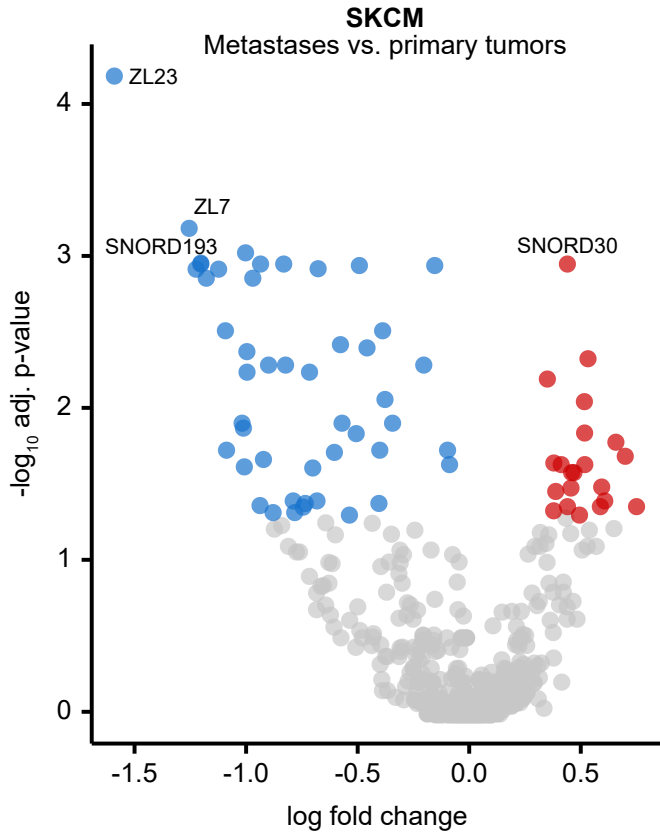

b

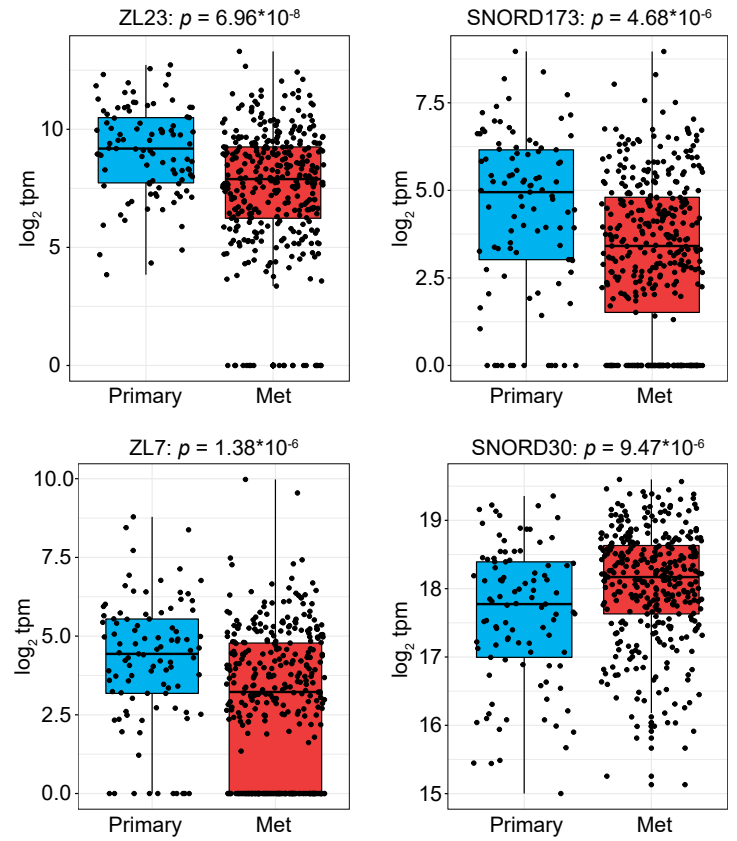

**Figure S11**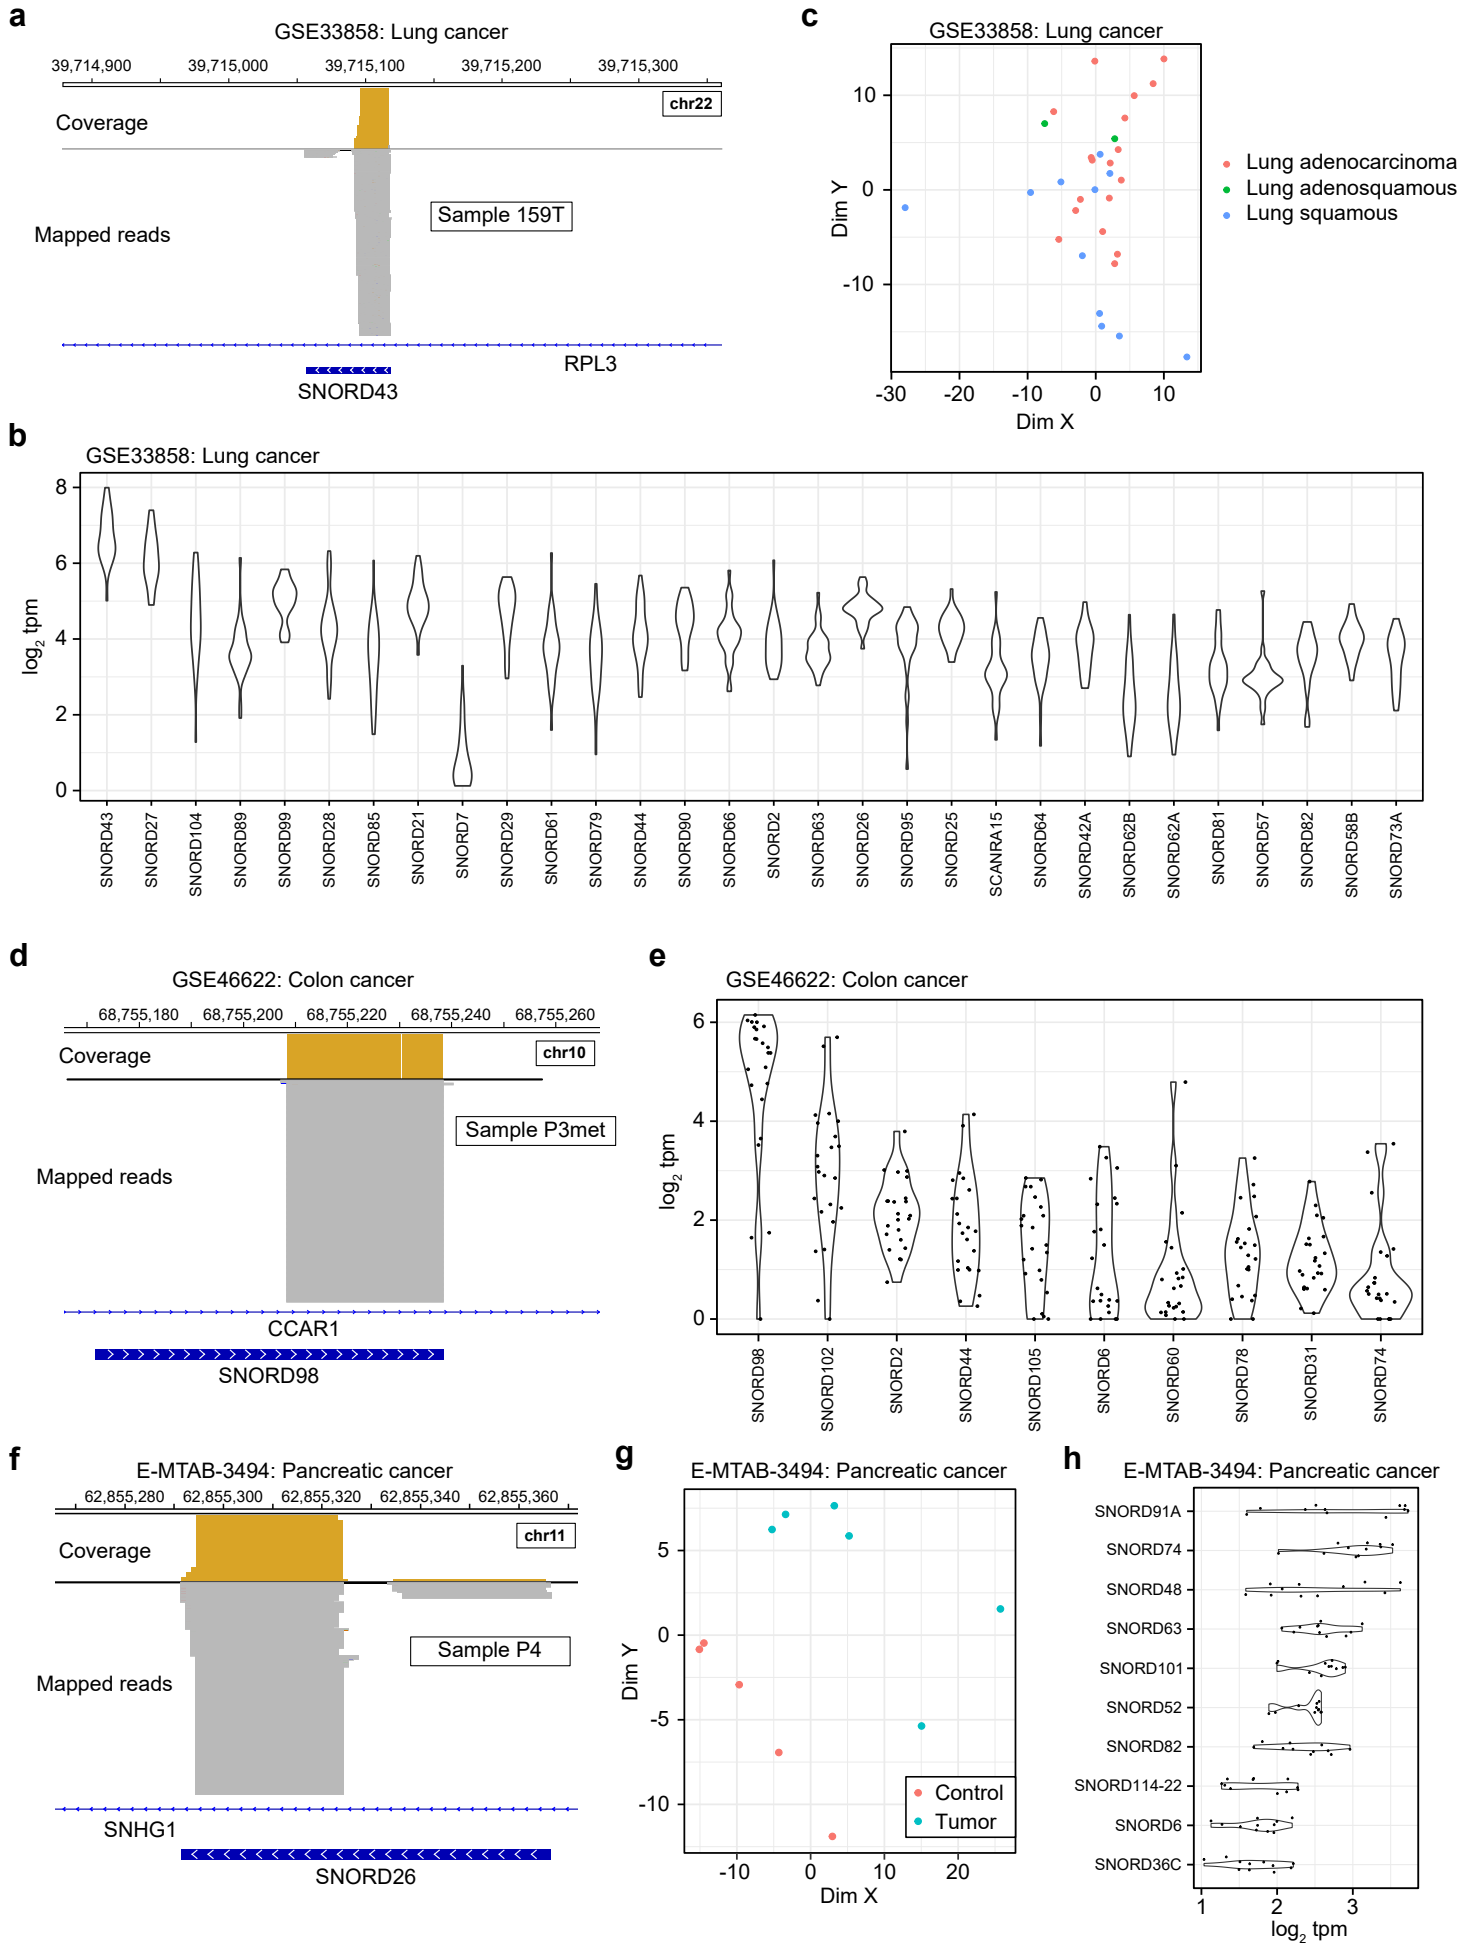

Supplement: NIHMS979336-supplement-2.pdf [file NIHMS979336-supplement-2.pdf]
